# Supplementary material for: Synthesis, characterization and magnetic properties of four new organically templated metal sulfates [C5H14N2][MII(H2O)6](SO4)2, (MII = Mn, Fe, Co, Ni)
Source: Royal Society of Chemistry journal article supplement (doi:10.1039/c1dt11030f), 2011-01-01
Supplement: c1dt11030f.pdf [file c1dt11030f.pdf]

**Table 1.** Crystal Data and Structure Refinement for Compounds 1–4

|                                                                            | 1                                                                              | 2                                                                              | 3                                                                              | 4                                                                              |
|----------------------------------------------------------------------------|--------------------------------------------------------------------------------|--------------------------------------------------------------------------------|--------------------------------------------------------------------------------|--------------------------------------------------------------------------------|
| empirical formula                                                          | C <sub>5</sub> H <sub>26</sub> MnN <sub>2</sub> O <sub>14</sub> S <sub>2</sub> | C <sub>5</sub> H <sub>26</sub> FeN <sub>2</sub> O <sub>14</sub> S <sub>2</sub> | C <sub>5</sub> H <sub>26</sub> CoN <sub>2</sub> O <sub>14</sub> S <sub>2</sub> | C <sub>5</sub> H <sub>26</sub> NiN <sub>2</sub> O <sub>14</sub> S <sub>2</sub> |
| formula weight                                                             | 457.33                                                                         | 458.24                                                                         | 461.32                                                                         | 461.08                                                                         |
| temperature (K)                                                            | 293(2)                                                                         | 293(2)                                                                         | 293(2)                                                                         | 293(2)                                                                         |
| crystal system                                                             | monoclinic                                                                     | monoclinic                                                                     | monoclinic                                                                     | monoclinic                                                                     |
| space group                                                                | P2 <sub>1</sub> /n                                                             | P2 <sub>1</sub> /c                                                             | P2 <sub>1</sub> /n                                                             | P2 <sub>1</sub> /c                                                             |
| <i>a</i> (Å)                                                               | 6.6385(10)                                                                     | 10.9273(2)                                                                     | 6.5710(2)                                                                      | 10.8328(2)                                                                     |
| <i>b</i> (Å)                                                               | 11.0448(2)                                                                     | 7.8620(10)                                                                     | 10.9078(3)                                                                     | 7.8443(10)                                                                     |
| <i>c</i> (Å)                                                               | 12.6418(2)                                                                     | 11.7845(3)                                                                     | 12.5518(3)                                                                     | 11.6790(2)                                                                     |
| β (deg)                                                                    | 101.903(10)                                                                    | 116.733(10)                                                                    | 101.547(2)                                                                     | 116.826(10)                                                                    |
| V(Å <sup>3</sup> )                                                         | 906.98(3)                                                                      | 904.20(3)                                                                      | 881.44(4)                                                                      | 885.63(2)                                                                      |
| Z                                                                          | 2                                                                              | 2                                                                              | 2                                                                              | 2                                                                              |
| D <sub>calc.</sub> (g·cm <sup>-3</sup> )                                   | 1.675                                                                          | 1.683                                                                          | 1.738                                                                          | 1.729                                                                          |
| λ <sub>(MoKα)</sub> (Å)                                                    | 0.71073                                                                        | 0.71073                                                                        | 0.71073                                                                        | 0.71073                                                                        |
| crystal form, color                                                        | prism-white                                                                    | prism-dark green                                                               | prism-red                                                                      | prism-clear green                                                              |
| crystal size (mm)                                                          | 0.31 × 0.07 × 0.03                                                             | 0.30 × 0.11 × 0.07                                                             | 0.22 × 0.14 × 0.06                                                             | 0.1 × 0.21 × 0.08                                                              |
| μ (mm <sup>-1</sup> )                                                      | 1.026                                                                          | 1.133                                                                          | 1.280                                                                          | 1.401                                                                          |
| Θ ranges (deg)                                                             | 2.91 – 27.48                                                                   | 2.91 – 30.50                                                                   | 2.91 – 27.48                                                                   | 2.91 – 27.48                                                                   |
| unique data                                                                | 2073                                                                           | 2750                                                                           | 2025                                                                           | 2012                                                                           |
| observed data [ <i>I</i> > 2σ( <i>I</i> )]                                 | 1893                                                                           | 2290                                                                           | 1862                                                                           | 1955                                                                           |
| F(000)                                                                     | 478                                                                            | 480                                                                            | 482                                                                            | 484                                                                            |
| goodness-of-fit on F <sup>2</sup>                                          | 1.085                                                                          | 1.060                                                                          | 1.141                                                                          | 1.050                                                                          |
| R <sub>1</sub> , wR <sub>2</sub> [ <i>I</i> > 2σ( <i>I</i> )] <sup>a</sup> | 0.0398, 0.1009                                                                 | 0.0431, 0.1070                                                                 | 0.0426, 0.1156                                                                 | 0.0414, 0.1173                                                                 |
| no. parameters                                                             | 199                                                                            | 122                                                                            | 199                                                                            | 140                                                                            |
| transmission factors                                                       | 0.8045 – 0.9106                                                                | 0.6722 – 0.8767                                                                | 0.5494 – 0.8135                                                                | 0.4936 – 0.7624                                                                |
| (Δρ) <sub>min</sub> , (Δρ) <sub>max</sub> , eÅ <sup>-3</sup>               | – 0.366 and 0.505                                                              | – 0.644 and 0.831                                                              | – 0.888 and 0.742                                                              | – 0.479 and 0.430                                                              |

**Table 2.** Selected Bond Distances (Å) and Angles (deg) for Compounds **1–4**<sup>a</sup>

| Octahedron around Mn (1)        |           |                                 |           |
|---------------------------------|-----------|---------------------------------|-----------|
| Mn(1)–OW(1)                     | 2.2013(2) | OW(3)–Mn(1)–OW(1)               | 88.38(7)  |
| Mn(1)–OW(2)                     | 2.1856(2) | OW(3)–Mn(1)–OW(1) <sup>#1</sup> | 91.62(7)  |
| Mn(1)–OW(3)                     | 2.1602(2) | OW(3)–Mn(1)–OW(2)               | 86.48(8)  |
| OW(2)–Mn(1)–OW(1)               | 91.82(8)  | OW(3)–Mn(1)–OW(2) <sup>#1</sup> | 93.52(8)  |
| OW(2)–Mn(1)–OW(1) <sup>#1</sup> | 88.18(8)  |                                 |           |
| Octahedron around Fe (2)        |           |                                 |           |
| Fe(1)–OW(1)                     | 2.1036(2) | OW(3)–Fe(1)–OW(1)               | 91.87(7)  |
| Fe(1)–OW(2)                     | 2.1403(2) | OW(3)–Fe(1)–OW(1) <sup>#2</sup> | 88.13(7)  |
| Fe(1)–OW(3)                     | 2.1263(2) | OW(3)–Fe(1)–OW(2)               | 86.59(7)  |
| OW(2)–Fe(1)–OW(1)               | 89.99(7)  | OW(3)–Fe(1)–OW(2) <sup>#2</sup> | 93.41(7)  |
| OW(2)–Fe(1)–OW(1) <sup>#2</sup> | 90.01(7)  |                                 |           |
| Octahedron around Co (3)        |           |                                 |           |
| Co(1)–OW(1)                     | 2.1105(2) | OW(3)–Co(1)–OW(1)               | 92.59(8)  |
| Co(1)–OW(2)                     | 2.0787(2) | OW(3)–Co(1)–OW(1) <sup>#1</sup> | 87.41(8)  |
| Co(1)–OW(3)                     | 2.0963(2) | OW(3)–Co(1)–OW(2)               | 86.00(8)  |
| OW(2)–Co(1)–OW(1)               | 87.14(7)  | OW(3)–Co(1)–OW(2) <sup>#1</sup> | 94.00(8)  |
| OW(2)–Co(1)–OW(1) <sup>#1</sup> | 92.86(7)  |                                 |           |
| Octahedron around Ni (4)        |           |                                 |           |
| Ni(1)–OW(1)                     | 2.064(2)  | OW(3)–Ni(1)–OW(1)               | 87.67(9)  |
| Ni(1)–OW(2)                     | 2.065(2)  | OW(3)–Ni(1)–OW(1) <sup>#2</sup> | 92.33(9)  |
| Ni(1)–OW(3)                     | 2.056(2)  | OW(3)–Ni(1)–OW(2)               | 89.11(10) |
| OW(2)–Ni(1)–OW(1)               | 85.98(9)  | OW(3)–Ni(1)–OW(2) <sup>#2</sup> | 90.89(10) |
| OW(2)–Ni(1)–OW(1) <sup>#2</sup> | 94.02(9)  |                                 |           |

<sup>a</sup> Symmetry transformations used to generate equivalent atoms: #1  $-x, -y, -z$ ; #2  $-x, -y+1, -z$ .

**Table 3.** Selected Bond Distances (Å) and Angles (deg) for [SO<sub>4</sub>] tetrahedron in **1–4**

|                | Mn ( <b>1</b> ) | Fe ( <b>2</b> ) | Co ( <b>3</b> ) | Ni ( <b>4</b> ) |
|----------------|-----------------|-----------------|-----------------|-----------------|
| S(1)–O(1)      | 1.4736(2)       | 1.4850(2)       | 1.479(2)        | 1.471(2)        |
| S(1)–O(2)      | 1.459(2)        | 1.4652(2)       | 1.452(2)        | 1.490(2)        |
| S(1)–O(3)      | 1.449(2)        | 1.4689(2)       | 1.466(2)        | 1.464(2)        |
| S(1)–O(4)      | 1.464(2)        | 1.4696(2)       | 1.464(3)        | 1.468(2)        |
| O(3)–S(1)–O(2) | 108.72(2)       | 109.15(10)      | 109.10(15)      | 110.97(15)      |
| O(3)–S(1)–O(4) | 109.22(2)       | 110.23(2)       | 108.95(19)      | 109.15(16)      |
| O(2)–S(1)–O(4) | 108.74(2)       | 109.15(2)       | 108.82(18)      | 108.10(14)      |
| O(3)–S(1)–O(1) | 112.43(1)       | 108.95(9)       | 109.26(13)      | 109.39(14)      |
| O(2)–S(1)–O(1) | 109.43(1)       | 110.97(2)       | 112.15(13)      | 108.91(13)      |
| O(4)–S(1)–O(1) | 109.43(1)       | 108.39(10)      | 108.50(14)      | 110.32(16)      |
